# Supplementary material for: Metal–organic frameworks towards bio-medical applications
Source: Royal Society of Chemistry journal article supplement (doi:10.1039/d1qm00784j), 2021-01-01
Supplement: d1qm00784j1.pdf [file d1qm00784j1.pdf]

## Supporting information

### Metal-organic frameworks towards bio-medical applications

Table S1 Table of Oral LD50 (Rats) and daily requirements (Humans) of commonly used metals in MOFs. Reproduced with permission.<sup>1</sup> Copyright 2011 American Chemical Society

| Metal | LD <sub>50</sub> (g/kg) | daily dose (mg) |
|-------|-------------------------|-----------------|
| Zr    | 4.1                     | 0.05            |
| Ti    | 25                      | 0.8             |
| Cu    | 0.025                   | 2               |
| Mn    | 1.5                     | 5               |
| Fe    | 30                      | 15              |
| Zn    | 0.35                    | 15              |
| Mg    | 8.1                     | 350             |
| Ca    | 1                       | 1000            |

### Reference

- 1 P. Horcajada, R. Gref, T. Baati, P. K. Allan, G. Maurin, P. Couvreur, G. Férey, R. E. Morris and C. Serre, Metal–Organic Frameworks in Biomedicine, *Chem. Rev.*, 2012, 112, 1232–1268.
